# Supplementary material for: Mixed-dimensional PdSe2/SiNWA heterostructure based photovoltaic detectors for self-driven, broadband photodetection, infrared imaging and humidity sensing
Source: Royal Society of Chemistry journal article supplement (doi:10.1039/c9ta13611h), 2020-01-01
Supplement: c9ta13611h1.pdf [file c9ta13611h1.pdf]

**Electronic Supplementary Information**

**Mixed-dimensional PdSe<sub>2</sub>/SiNWA heterostructures based photovoltaic detectors towards self-driven, broadband photodetection, infrared imaging and humidity sensing**

Di Wu,<sup>a</sup> Cheng Jia,<sup>a</sup> Fenghua Shi,<sup>b</sup> Longhui Zeng,<sup>\*c</sup> Pei Lin,<sup>a</sup> Lin Dong,<sup>a</sup> Zhifeng Shi,<sup>a</sup> Yongtao Tian,<sup>a</sup> Xinjian Li,<sup>a</sup> and Jiansheng Jie<sup>\*d</sup>

<sup>a</sup>School of Physics and Microelectronics, Key Laboratory of Material Physics, Ministry of Education, Zhengzhou University, Zhengzhou, Henan 450052, China

<sup>b</sup>College of Physics and Electronic Information, Anhui Normal University, Wuhu, Anhui 241000, China

<sup>c</sup>Department of Applied Physics and Materials Research Center, The Hong Kong Polytechnic University, Hung Hom, Kowloon, Hong Kong, China

<sup>d</sup>Institute of Functional Nano & Soft Materials (FUNSOM), Soochow University, Suzhou, Jiangsu 215123, China

\*Corresponding author: E-mail: lhzeng.hfut@gmail.com, E-mail: jsjie@suda.edu.cn

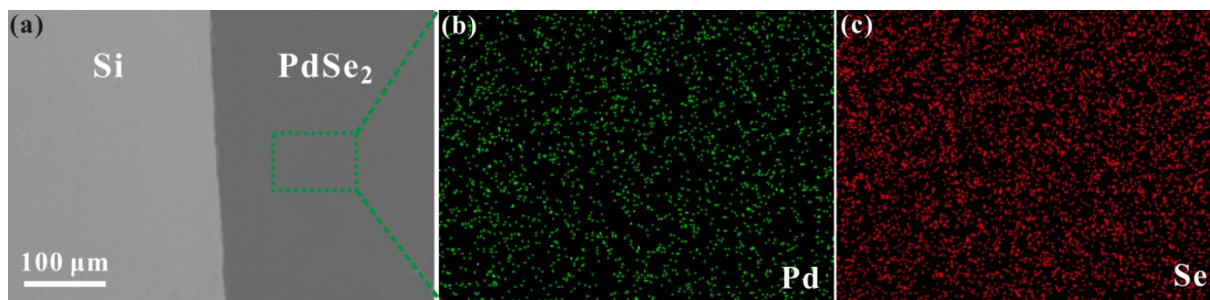

**Fig. S1** (a) SEM image and the EDS mappings for (b) Pd and (c) Se elements.

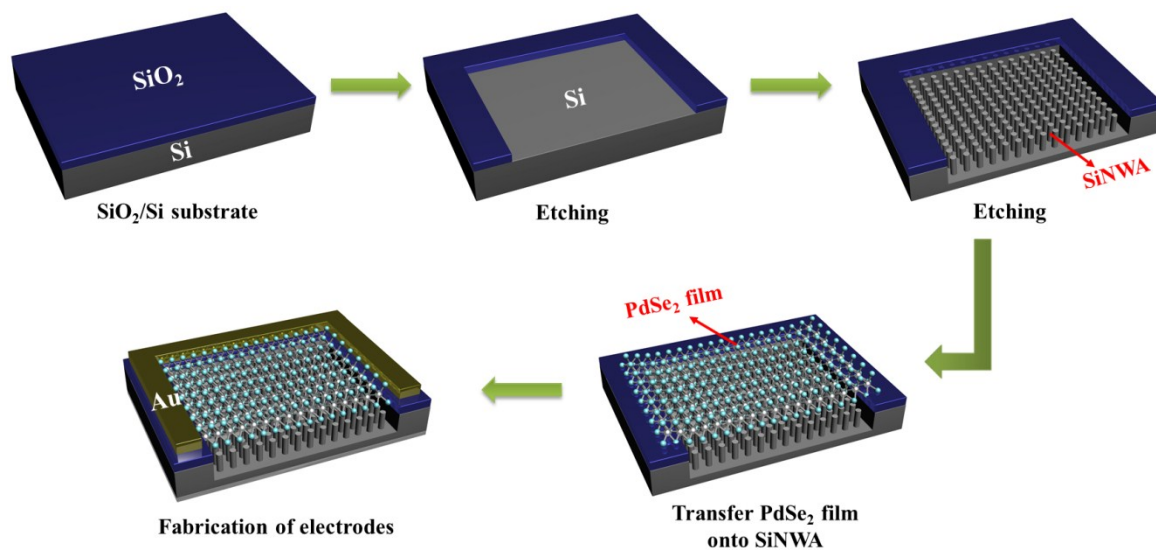

**Fig. S2** Schematic diagram of fabrication process for a PdSe<sub>2</sub>/SiNWA heterostructure device.

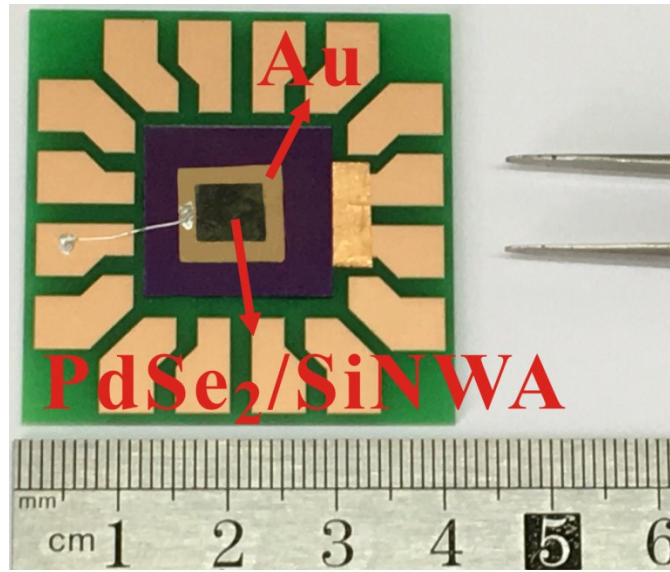

**Fig. S3** Digital photograph of the as-fabricated PdSe<sub>2</sub>/SiNWA heterostructure device, which is mounted a circuit board for measurements.

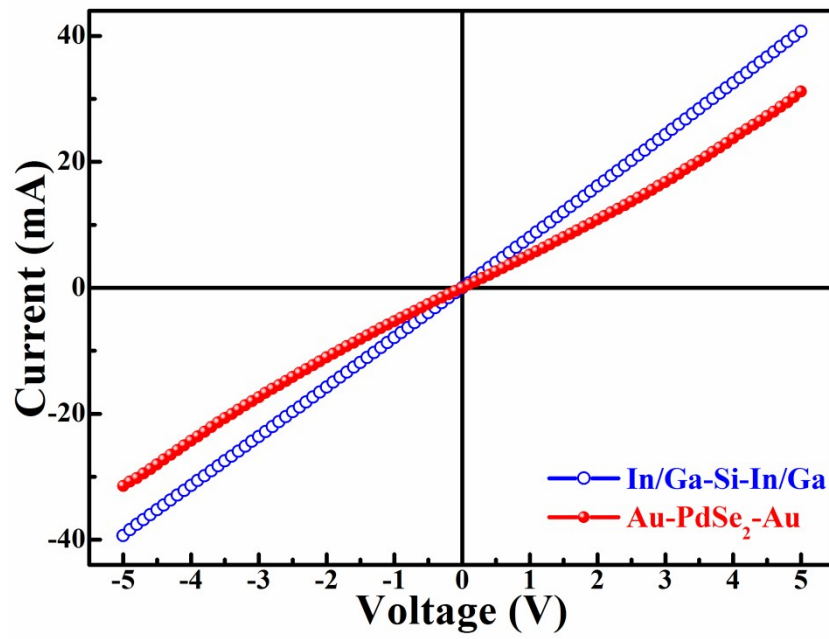

**Fig. S4**  $I$ - $V$  curves of Au-PdSe<sub>2</sub>-Au and In/Ga-Si-In/Ga.

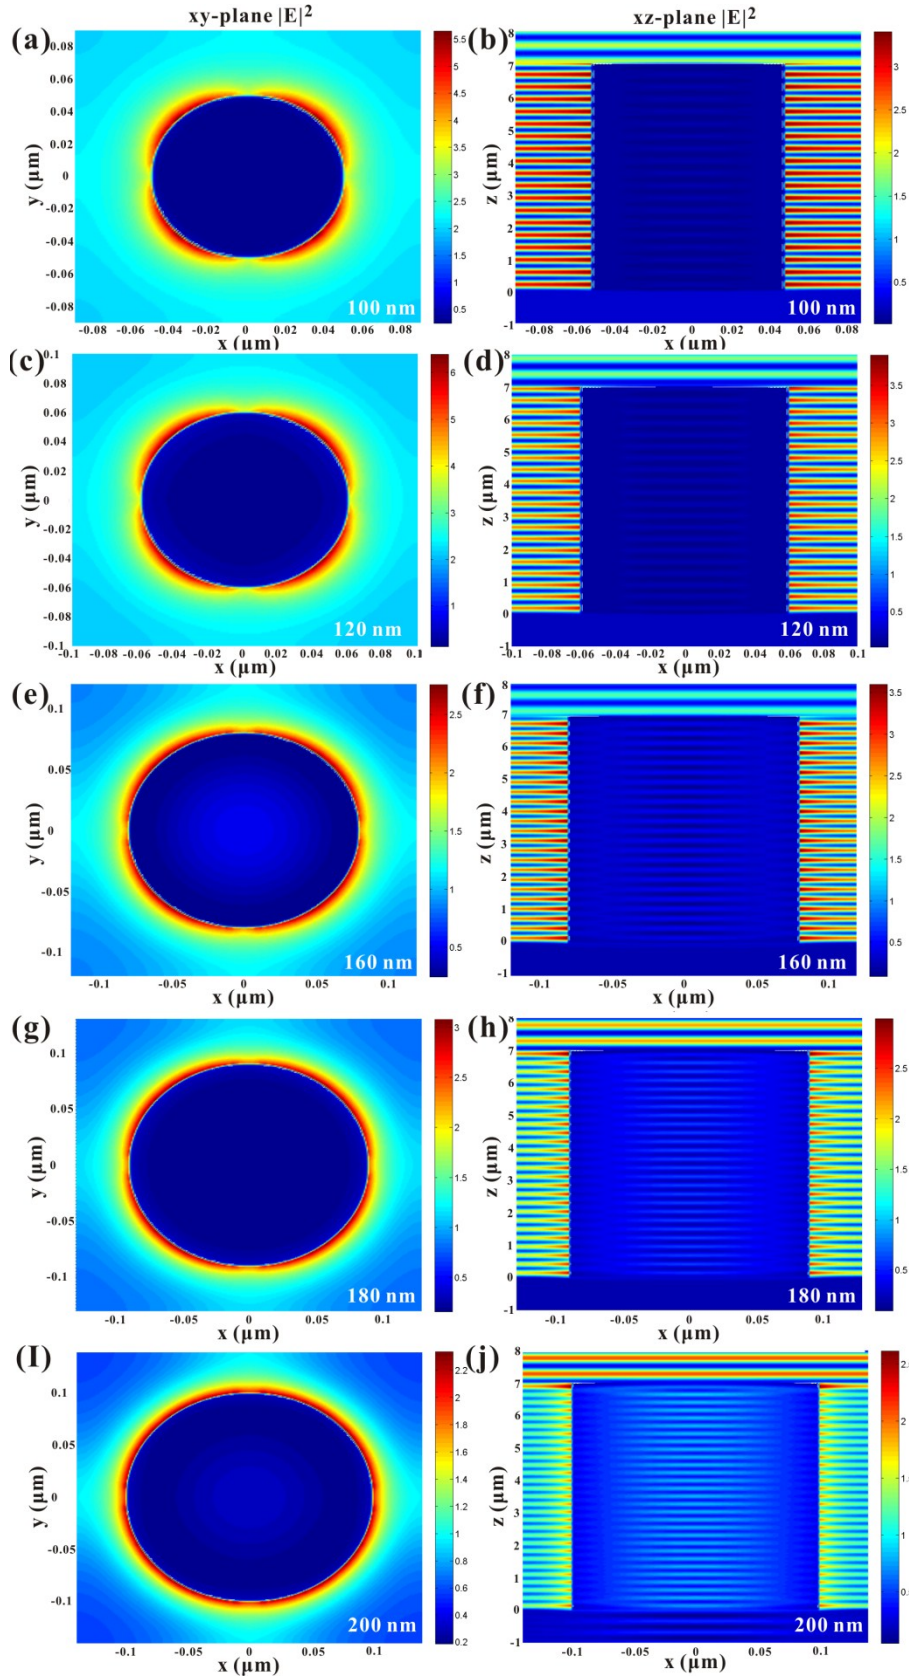

**Fig. S5** Theoretical simulations of PdSe<sub>2</sub>/SiNWA structure. Simulated electric field energy distribution for the PdSe<sub>2</sub>/SiNWs with diameter of (a, b) 100 nm, (c, d) 120 nm, (e, f) 160 nm, (g, h) 180 nm, and (i, j) 200 nm.

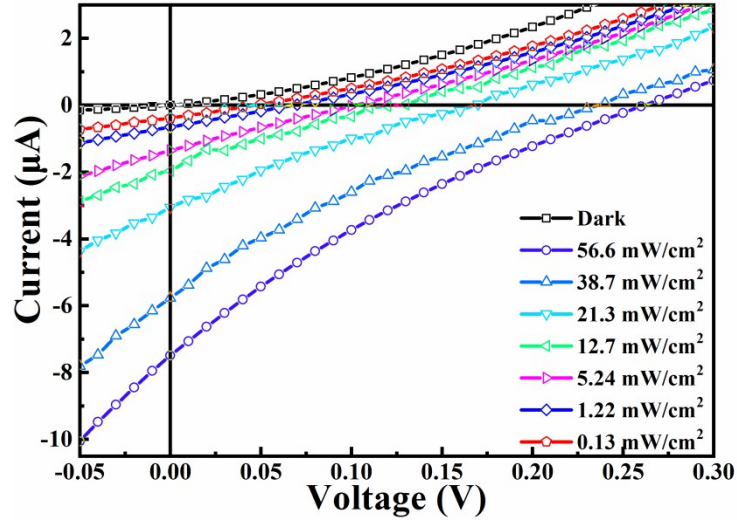

**Fig. S6** Enlarged  $I$ - $V$  curves of the PdSe<sub>2</sub>/SiNWA heterostructure device, which show the photovoltaic behaviors of the device under 980 nm light illumination with different light intensities.

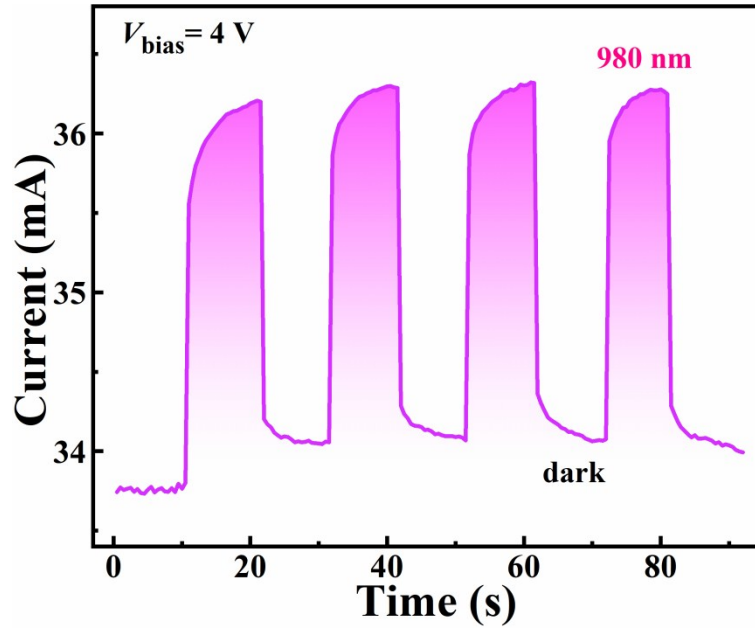

**Fig. S7.** The photoresponse property of the SiNWA under 980 nm light illumination.



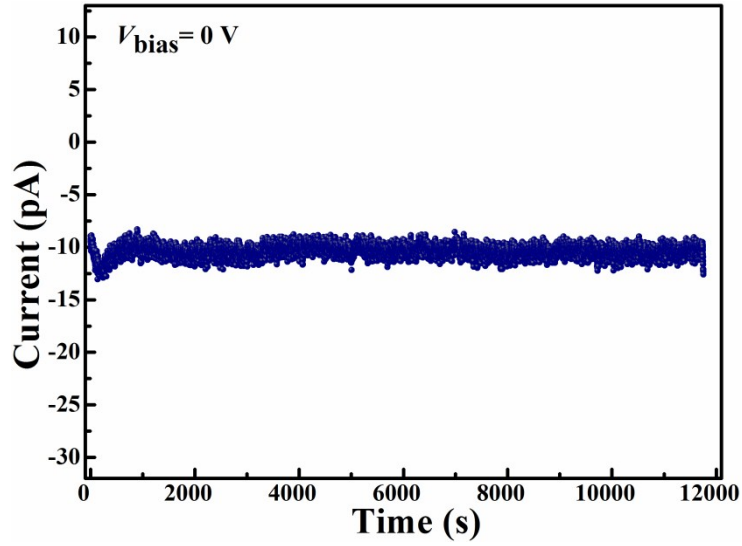

**Fig. S8** Dark current of the PdSe<sub>2</sub>/SiNWA heterostructure device measured at zero external bias voltage.

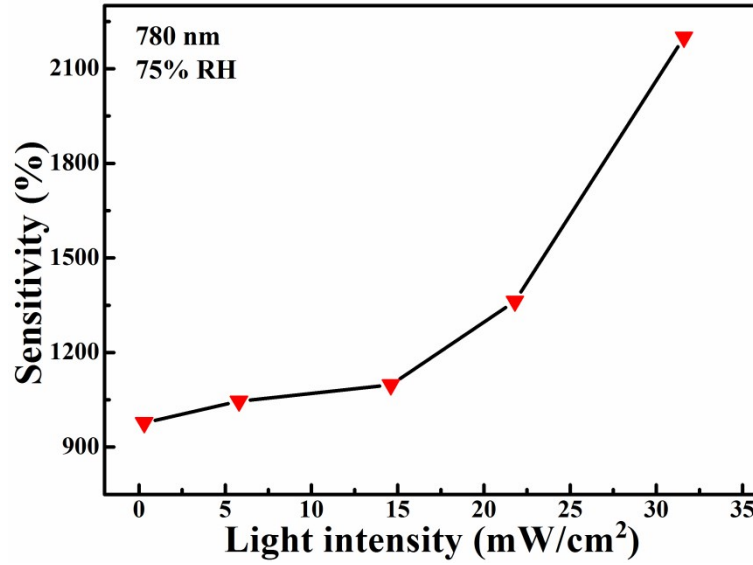

**Fig. S9** Dependence relation between sensitivity and light intensity of 780 nm at 75% RH.

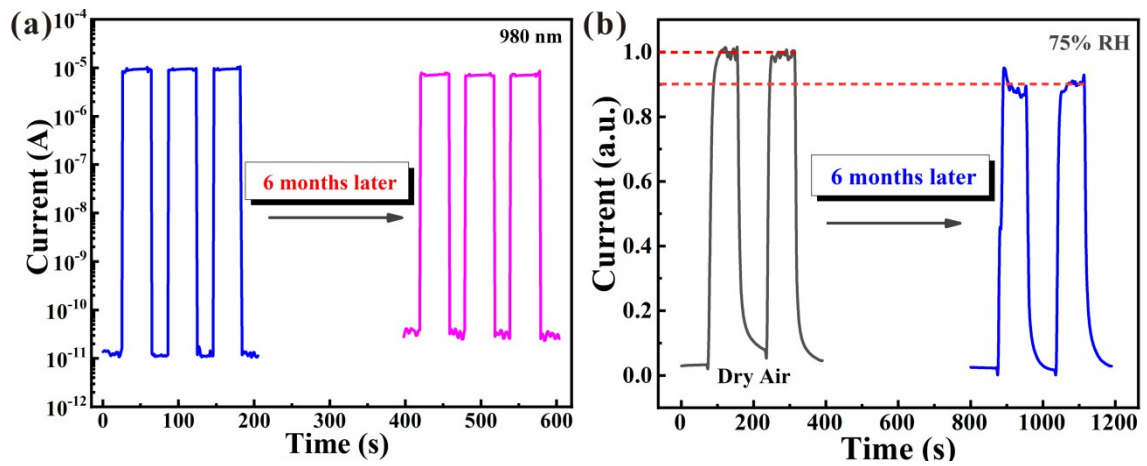

**Fig. S10** The photoresponse and humidity sensing properties of PdSe<sub>2</sub>/SiNWA heterostructure device after storage in the air for six months.
